# Supplementary material for: CSF1R inhibition with PLX5622 affects multiple immune cell compartments and induces tissue-specific metabolic effects in lean mice
Source: PubMed Central journal article supplement (PMC10627931; doi:10.1007/s00125-023-06007-1), 2023-10-04
Supplement: 125_2023_6007_MOESM1_ESM.pdf [file 125_2023_6007_MOESM1_ESM.pdf]

## **Extended data**

### **CSF1R-inhibition with PLX5622 affects multiple immune cell compartments and induces tissue-specific metabolic effects in lean mice**

Immune cell and metabolic effects of CSF1R-inhibition

**Authors:** Angela J. T. Bosch<sup>1</sup>, Lena Keller<sup>1</sup>, Laura Steiger<sup>1</sup>, Theresa V. Rohm<sup>1</sup>, Sophia J. Wiedemann<sup>1</sup>, Andy J. Y. Low<sup>1</sup>, Marc Stawiski<sup>1</sup>, Leila Rachid<sup>1</sup>, Julien Roux<sup>1,2</sup>, Daniel Konrad<sup>3</sup>, Stephan Wueest<sup>3</sup>, Sonia Tugues<sup>4</sup>, Melanie Greter<sup>4</sup>, Marianne Böni-Schnetzler<sup>1</sup>, Daniel T. Meier<sup>1</sup>, Claudia Cavelti-Weder<sup>1,5,6\*</sup>

## **ESM Methods**

### **Hyperinsulinemic-euglycemic clamp studies**

Mice were anesthetized with isoflurane and eye ointment was applied to both eyes (Vitamin A, Bausch & Lomb Swiss AG, Switzerland). A catheter (MRE 025, Braintree Scientific, Braintree, MA, USA) was inserted into the right jugular vein and exteriorized at the neck. Five to seven days after the surgery, clamp was performed in freely moving mice after 5 h fasting. To assess basal glucose turnover, mice were infused with 3-<sup>[3H]</sup> glucose (3.7\*10<sup>4</sup> bq bolus and 1850 bq/min, Perkin Elmer, Waltham, Massachusetts, USA) for 80 min. After blood collection from the tail vein, hyperinsulinemia was induced by a constant insulin infusion (240 mU/kg bolus and 12 mU/kg\*min) paralleled by 3-<sup>[3H]</sup> glucose infusion (7.4\*10<sup>4</sup> bq bolus and 3700 bq/min). Steady state glucose infusion rate was calculated once glucose infusion reached a more or less constant rate for 15-20 min with blood glucose levels clamped at ~5-6 mmol/L. Glucose disposal rate was calculated by dividing the rate of 3-<sup>[3H]</sup> glucose infusion by the plasma 3-<sup>[3H]</sup> glucose specific activity. Endogenous glucose production during the clamp was calculated by subtracting the glucose infusion rate from the glucose disposal rate. In order to assess tissue specific glucose uptake, a bolus (3.7\*10<sup>5</sup> bq) of 2-[1-<sup>14</sup>C] deoxyglucose (Perkin Elmer) was administered via catheter at the end of the steady state period. Blood was sampled 2, 15, 25 and 35 min after bolus delivery. Area under the curve of disappearing plasma 2-[1-<sup>14</sup>C] deoxyglucose was used together with tissue-concentration of phosphorylated 2-[1-<sup>14</sup>C] deoxyglucose to calculate glucose uptake. Accumulation of 2-[1-<sup>14</sup>C] deoxyglucose was determined in an aqueous tissue extract after homogenization. Phosphorylated 2-[1-<sup>14</sup>C] deoxyglucose was separated by Poly-Prep columns (#731-6212, BioRad, USA).

## **Isolation and flow cytometry of immune cells**

Adipose and liver tissues were minced and digested in a thermomixer (Eppendorf, Germany) using Collagenase IV (Worthington, USA) solution (1HBSS (Gibco, USA), 10mM HEPES (Sigma, USA), 1.5mg/mL Collagenase IV and 8.25 $\mu$ g/mL DNase I (Roche, Switzerland)) 20-30min, 37 °C with 400rpm. Digestion was stopped by adding FACS buffer (PBS, 0.5% BSA (VWR, USA) and 5mM EDTA (Sigma)), the suspension was filtered (cotton gauze) and washed. Erythrocytes of the adipose tissue were removed by incubation with Red Cell Lysis Buffer (154mM NH<sub>4</sub>Cl, 10mM KHCO<sub>3</sub>, 0.1mM EDTA (Gibco, USA), while liver immune cells were enriched by Percoll gradient (GE Healthcare, USA; 70% and 40%, 20min, 600g, minimal brake).

Cells of the peritoneum were isolated by peritoneal lavage with 10mL FACS buffer. Erythrocytes were lysed as described above.

For microglia isolation, whole-brains were mechanically dissociated in FACS buffer using a Dounce-homogenizer (Merck, USA). Cells were passed through a 70 $\mu$ m cell strainer, washed with FACS buffer, and immune cells enriched by Percoll gradient (70% and 37%, 30min, 750g, minimal brake). The microglia-containing interphase was collected, washed and stained.

To isolate colon immune cells, the colon was washed in HBBS, cut into small pieces, washed twice 10 min in HBSS containing 2 mM EDTA (Sigma) shaking at 37 °C, rinsed twice with HBSS and digested with 1mg/mL collagenase VIII (Sigma-Aldrich) and 12.5 $\mu$ g/mL DNase I (Roche), 30min shaking at 37 °C, followed by homogenization (gentleMACS Dissociator: mouse intestine program; Milteny Biotec, Germany). Leukocytes were enriched by Percoll (as described for liver).

Lungs were perfused with PBS, chopped and minced (gentleMACS program m\_lung\_01-02), digested 30min at 37 °C on shaking with 0.15 WünschU/mg Liberase (Roche)

and 0.1mg/mL DNase I, followed by homogenization using gentleMACS program m\_lung\_02\_01. Leukocytes were enriched by Percoll as described above.

To isolate islets immune cells, pancreas was digested using 1.5mg/mL Collagenase IV (30 min, 37°C) and islets subsequently purified by filtration and hand-picking. Islets were dispersed using 0.01% Trypsin+EDTA (Gibco) (1min 30sec at 37°C).

Spleens were mashed with a syringe plunger on a 70µm filter in red cell lysis buffer, washed and subsequently stained.

Thymus was mashed using a syringe plunger and a 70µm filter in FACS buffer, washed and subsequently stained.

Blood was collected in FACS buffer and stained 30min and lysed using BD FACS lysis solution (BD, USA), according to the manufacturer's protocol.

Cell counting was performed using EVE automated cell counting system (Nano Entek Inc., South Korea), using the following parameters sensitivity 5, size 3-30µm, circularity 50%.

Cell analysis was performed on a FACS LSRII Fortessa (BD). Acquired data were analyzed using FlowJo software (Version 10.6 or higher, TreeStar Inc. Ashland, OR, USA). Gating strategies are summarized in ESM Figures 1 and 2.

Antibodies against CD16/32, CD11b (M1/70), CD11c (N418), MHCII (M5/114.14.2), Ly6C (HK1.4), CD45 (30-F11), F4/80 (BM8), CD103 (2E7), CD24 (M1/69), CD64 (X54-5/7.1), CD3 (145-2C11 and 17A2), CD19 (6D5), NK1.1 (PL136), Ly6G (1A8), CD206 (C068C2), CD25 (PC61), CD4 (GK1.5), CD8 (53-6.7), TCR-b (H57-597), TNF (MP6-XT22), IL10 (JES5-16E3) and IFN (XMG1.2) were purchased from BioLegend (USA). mAb for CCR2 (475301) from R&D (USA), and mAb for Foxp3 (FJK-16s), GATA3 (TWAJ), EOMES (Dan11mag), Il1b (NJTEN3), and IL6 (MP5-20F3) from Thermo Fisher Scientific (USA). mAb for Siglec F (E50-2440) and RORγt (Q31-378) were obtained from BD. Further details ESM Table 1.

For surface staining, single cell suspensions were stained 30min at 4°C. For intracellular staining, the Foxp3 staining kit (Thermo Fischer Scientific) was used according to the manufacturer's protocol. For cytokine staining, cells were cultured 4h in the presence of cellular protein transport inhibitors Brefeldin A (5µg/mL, Sigma) and Monensin (1µg/mL, Sigma) in 2 or 20mM glucose, followed by washing and staining (30 min, 4°C in the dark). Intracellular cytokine staining was performed using IC Fixation Buffer (Thermo Fischer Scientific) according to the manufacturers protocol. Antibody concentrations were verified by titrating experiments.

### **Beta-cell mass**

For heat-induced antigen retrieval, 5µm thick sections were boiled 30min at 93°C in epitope retrieval solution (Biosystems, Switzerland) and stained overnight (4°C) with an insulin antibody (Agilent, USA), washed twice in PBS (5min), stained 2h at room temperature for CD45 (Rat Anti-CD45; 30-F11, BD Bioscience), washed twice with PBS (5min) before applying the secondary antibodies (2h, room temperature; Alexa647 goat anti-guinea pig IgG and Alexa555 goat anti-rat IgG; Thermo Fisher Scientific), then washed twice (PBS), before mounting with a fluorescence mounting media (Dako). Pictures were acquired using a Nikon microscope (4x magnification). For alpha- to beta-cell ratio, slides were stained as described above using primary antibodies against insulin and glucagon (Thermo Fischer Scientific) and secondary antibodies Alexa488 goat anti-guinea pig IgG and Alexa647 goat anti-rabbit IgG, respectively (Thermo Fischer Scientific). For details on antibodies see Table 1.

Images were analyzed using Fiji software. Analysis was performed in a semi-automated way; ilastik software (Version 1.3.2, <https://www.ilastik.org/>) was trained twice, once to recognize pancreas area excluding background and lymph nodes, and the second time to recognize islets. The masks ilastik generated were used to quantify the areas with Fiji. Beta-

cell mass was defined as the ratio of insulin-positive area to total pancreas area multiplied by the weight of the pancreas. Two sections per animal 100µm apart were quantified.

### **RNA-Sequencing**

A first batch of 9 male mice from different litters of age between 4 and 5 weeks were fed a PLX5622 or a control diet for 5.5. months. A second batch of 4 male mice of age 5 weeks were fed a PLX5622 or control diet for 8.5. months. All mice were euthanized on the same day and RNA isolation was performed on lysed pancreatic islets using a NucleoSpin RNA kit (Macherey Nagel, Germany). RNA samples were quantified and quality-controlled using a High Sensitivity RNA ScreenTape on an Agilent TapeStation instrument. RNA-seq library preparation (Illumina Truseq stranded kit, USA) was performed at the Genomics Facility Basel of the ETH Zurich, Basel, starting from 80ng of total RNA, and controlled on an Agilent Fragment Analyzer instrument. Sequencing was performed on the Illumina NextSeq 500 platform to produce paired-end 38nt reads.

Data analysis was performed by the Bioinformatics Core Facility, Department of Biomedicine, University of Basel. Read quality was assessed with the FastQC tool (version 0.11.5). Reads were mapped to the mouse genome mm10 with STAR (version 2.7.0c)<sup>26</sup> with default parameters, except filtering out multimapping reads with more than 10 alignment locations (outFilterMultimapNmax=10) and filtering reads without evidence in the spliced junction table (outFilterType="BySJout"). All subsequent analyses were performed using the R software (version 4.0.0) and Bioconductor 3.11 packages. The *featureCounts* function from the Bioconductor Rsubread package (version 2.2.3)<sup>27</sup> was used to count the number of reads

(5' ends) overlapping with the exons of each gene (Ensembl release 96) assuming an exon union model<sup>28,29</sup>.

The Bioconductor package edgeR (version 3.30.3)<sup>30</sup> was used for differential gene expression analysis. Between samples normalization was performed using the TMM method<sup>31</sup>. Genes with CPM values above 1 in at least 2 samples were retained for the differential expression analysis. To test for gene expression differences between mice fed PLX5622 or a control diet, a model accounting for the treatment and treatment duration effects was fitted to the read counts using a quasi-likelihood testing framework (edgeR functions *glmQLFit* and *glmQLFTest*)<sup>32</sup>. P-values were adjusted by controlling the false discovery rate (FDR; Benjamini-Hochberg method) and genes with a FDR lower than 5% were considered significant. Gene set enrichment analysis was performed with the function *camera*<sup>33</sup> from the edgeR package (using the default parameter value of 0.01 for the correlations of genes within gene sets) using gene sets from the c5 collection (Gene Ontology categories) and c8 (cell type signatures) of the MSigDB Molecular Signature Database (version 7.2)<sup>34</sup>. We filtered out sets containing less than 10 genes, and gene sets with a FDR lower than 5% were considered significant. A list of mediators of cytokine activity was compiled by downloading the mouse genes annotated to both the GO terms "transcription factor" (GO:0003700) and "regulation of cytokine production" (GO:0001817) using the QuickGO website (download date: May 23<sup>rd</sup> 2022) and crossed to the differential expression results (ESM Table 4).

**ESM Table 1: Reagent and resource table.**

| REAGENT or RESOURCE                                                                      | SOURCE                    | IDENTIFIER                                       |
|------------------------------------------------------------------------------------------|---------------------------|--------------------------------------------------|
| Antibodies                                                                               |                           |                                                  |
| Anti-mouse CD115 (AFS98)                                                                 | BioXCell                  | Cat#BE0213; RRID: <a href="#">AB_2687699</a>     |
| Anti-trinitrophenol rat IgG2a isotype control (2A3)                                      | BioXCell                  | Cat#BP0089; RRID: <a href="#">AB_1107769</a>     |
| Anti-mouse CD16/32 (93)                                                                  | Biologend (USA)           | Cat#101321; RRID: <a href="#">AB_2103871</a>     |
| Anti-mouse CD11c (N418) BV650                                                            | Biologend                 | Cat#117339; RRID: <a href="#">AB_2562414</a>     |
| Anti-mouse CD11c (N418) PE-Cy7                                                           | Biologend                 | Cat#117318; RRID: <a href="#">AB_493568</a>      |
| Anti-mouse CD11b (M1/70) BV421                                                           | Biologend                 | Cat#101236; RRID: <a href="#">AB_11203704</a>    |
| Anti-mouse CD45 (30-F11) PerCP-Cy5.5                                                     | Biologend                 | Cat#103131; RRID: <a href="#">AB_893344</a>      |
| Anti-mouse I-A/I-E (M5/114.15.2) BV785                                                   | Biologend                 | Cat#107645; RRID: <a href="#">AB_2565977</a>     |
| Anti-mouse Ly6C (HK1.4) FITC                                                             | Biologend                 | Cat#128005; RRID: <a href="#">AB_1186134</a>     |
| Anti-mouse CCR2 (475301) PE                                                              | R&D Systems               | Cat#FAB5538P; RRID: <a href="#">AB_10718414</a>  |
| Anti-mouse CD103 (2E7) PE-Dazzle594                                                      | Biologend                 | Cat#121430; RRID: <a href="#">AB_2566493</a>     |
| Anti-mouse CD24 (M1/69) PE-Cy7                                                           | Biologend                 | Cat#101821; RRID: <a href="#">AB_756047</a>      |
| Anti-mouse CD64 (X54-5/7.1) APC                                                          | Biologend                 | Cat#139306; RRID: <a href="#">AB_11219391</a>    |
| Anti-mouse CD3 (145-2C11) APC-Cy7                                                        | Biologend                 | Cat#100330; RRID: <a href="#">AB_1877170</a> ;   |
| Anti-mouse Nk1.1 (PK136) APC-Cy7                                                         | Biologend                 | Cat#108723; RRID: <a href="#">AB_830870</a>      |
| Anti-mouse CD19 (6D5) APC-Cy7                                                            | Biologend                 | Cat#115530; RRID: <a href="#">AB_830707</a>      |
| Anti-mouse Siglec F (E50-2440) BV510                                                     | BD Biosciences (USA)      | Cat#740158; RRID: <a href="#">AB_2739911</a>     |
| Anti-mouse F4/80 (BM8) PE                                                                | Biologend                 | Cat#123110; RRID: <a href="#">AB_893486</a>      |
| Anti-mouse CD206 (C068C2) A647                                                           | Biologend                 | Cat#141712; RRID: <a href="#">AB_10900420</a>    |
| Anti-mouse CD3 (17A2) BV711                                                              | Biologend                 | Cat#100241; RRID: <a href="#">AB_2563945</a>     |
| Anti-mouse TCR $\beta$ (H57-597) APC                                                     | Biologend                 | Cat#109211; RRID: <a href="#">AB_313434</a>      |
| Anti-mouse TCR $\gamma\delta$ (GL3) PE                                                   | Biologend                 | Cat#118107; RRID: <a href="#">AB_313831</a>      |
| Anti-mouse CD8a (53-6.7) A700                                                            | Biologend                 | Cat#100729; RRID: <a href="#">AB_493702</a>      |
| Anti-mouse CD8b (YTS156.7.7) FITC                                                        | Biologend                 | Cat#126605; RRID: <a href="#">AB_961293</a>      |
| Anti-mouse CD4 (GK1.5) PE-Dazzle 594                                                     | Biologend                 | Cat#100456; RRID: <a href="#">AB_2565845</a>     |
| Anti-mouse CD25 (PC61) BV605                                                             | Biologend                 | Cat#102035; RRID: <a href="#">AB_11126977</a>    |
| Anti-mouse Foxp3 (FJK-16s) APC                                                           | Thermo Fisher Scientific  | Cat#17-5773-82; RRID: <a href="#">AB_469457</a>  |
| Anti-mouse Ror $\gamma$ (Q31-378) BV786                                                  | BD Biosciences            | Cat#564723; RRID: <a href="#">AB_2738916</a>     |
| anti-GATA3 (TWAJ) A488                                                                   | Thermo Fisher Scientific  | Cat#52-9966-43; RRID: <a href="#">AB_2574493</a> |
| Guinea pig-anti-insulin                                                                  | Agilent                   | Cat#A0564; RRID: <a href="#">AB_10013624</a>     |
| Rabbit-anti-glucagon                                                                     | Thermo Fischer Scientific | Cat#PA-589937; RRID: <a href="#">AB_2805852</a>  |
| Rat Anti-CD45 (30-F11) Monoclonal Antibody, Unconjugated                                 | BD Biosciences            | Cat#553076; RRID: <a href="#">AB_394606</a>      |
| Goat anti-Guinea Pig IgG (H+L) Highly Cross-Adsorbed Secondary Antibody, Alexa Fluor 647 | Thermo Fisher Scientific  | Cat#A-21450; RRID: <a href="#">AB_2735091</a>    |
| Goat anti-Rat IgG (H+L) Cross-Adsorbed Secondary Antibody, Alexa Fluor 555               | Thermo Fisher Scientific  | Cat#A-21434; RRID: <a href="#">AB_2535855</a>    |
| Goat anti-Guinea Pig IgG (H+L) Highly Cross-Adsorbed Secondary Antibody, Alexa Fluor 488 | Thermo Fisher Scientific  | Cat#A-11073; RRID: <a href="#">AB_2534117</a>    |



|                                                                                         |                                      |                                                                                                                                                                                                                                                                                       |
|-----------------------------------------------------------------------------------------|--------------------------------------|---------------------------------------------------------------------------------------------------------------------------------------------------------------------------------------------------------------------------------------------------------------------------------------|
| Goat anti-Rabbit IgG (H+L) Highly Cross-Adsorbed Secondary Antibody, Alexa Fluor 647    | Thermo Fischer Scientific            | Cat#A-21244; <a href="#">AB_2535812</a>                                                                                                                                                                                                                                               |
| <b>Chemicals, Peptides, and Recombinant Proteins</b>                                    |                                      |                                                                                                                                                                                                                                                                                       |
| Recombinant Il-1 $\beta$                                                                | R&D Systems                          | Cat#4001-ML                                                                                                                                                                                                                                                                           |
| Collagenase IV                                                                          | Worthington                          | Cat# LS004189                                                                                                                                                                                                                                                                         |
| Collagenase VIII                                                                        | Sigma-Aldrich                        | Cat# C2139                                                                                                                                                                                                                                                                            |
| Liberase                                                                                | Roche                                | Cat# 5401020001                                                                                                                                                                                                                                                                       |
| DNase 1                                                                                 | Roche                                | Cat# 11284932001                                                                                                                                                                                                                                                                      |
| Percoll                                                                                 | GE Healthcare (USA)                  | Cat# GE17-0891-01                                                                                                                                                                                                                                                                     |
| PLX5622 (CFS1R inhibitor)                                                               | Plexxikon                            | MTA                                                                                                                                                                                                                                                                                   |
| <b>Critical Commercial Assays</b>                                                       |                                      |                                                                                                                                                                                                                                                                                       |
| Mouse/rat insulin kit                                                                   | MesoScale Diagnostics                | Cat#K152BZC                                                                                                                                                                                                                                                                           |
| V-Plex custom mouse cytokine proinflammatory panel 1 mouse TNF- $\alpha$ and mouse IL-6 | MesoScale Diagnostics                | Cat#K15048                                                                                                                                                                                                                                                                            |
| Foxp3 staining Kit                                                                      | Thermo Fisher Scientific             | Cat# 00-5523-00                                                                                                                                                                                                                                                                       |
| NucleoSpin RNA kit                                                                      | Macherey Nagel                       | Cat# 740955                                                                                                                                                                                                                                                                           |
| RNeasy Plus Universal Mini kit                                                          | Qiagen                               | Cat# 73404                                                                                                                                                                                                                                                                            |
| GoScript <sup>TM</sup>                                                                  | Promega                              | Cat# A5003                                                                                                                                                                                                                                                                            |
| GoTaq qPCR Master Mix                                                                   | Promega                              | Cat# A4472919                                                                                                                                                                                                                                                                         |
| <b>Deposited Data</b>                                                                   |                                      |                                                                                                                                                                                                                                                                                       |
| scRNA-seq Data                                                                          | This paper                           | GSE189434                                                                                                                                                                                                                                                                             |
| <b>Experimental Models: Organisms/Strains</b>                                           |                                      |                                                                                                                                                                                                                                                                                       |
| Mouse, C57BL/6NCr1                                                                      | Charles River laboratories (Germany) | RRID:IMSR_CRL:027                                                                                                                                                                                                                                                                     |
| <b>Oligonucleotides</b>                                                                 |                                      |                                                                                                                                                                                                                                                                                       |
| Primers for qPCR -> ESM Table 2                                                         | Microsynth                           | N/A                                                                                                                                                                                                                                                                                   |
| <b>Software and Algorithms</b>                                                          |                                      |                                                                                                                                                                                                                                                                                       |
| Fiji software ImageJ 1.52n with Java 1.8.0_172                                          |                                      | <a href="https://imagej.net/Fiji">https://imagej.net/Fiji</a>                                                                                                                                                                                                                         |
| Ilastik (version 1.3.2)                                                                 |                                      | <a href="http://www.ilastik.org">www.ilastik.org</a>                                                                                                                                                                                                                                  |
| Flow jo (version 9.9 or higher)                                                         | Becton Dickinson & Company (BD)      | <a href="https://flowjo.com">https://flowjo.com</a>                                                                                                                                                                                                                                   |
| BD FACS Diva (version 8.0.1)                                                            | Becton Dickinson & Company (BD)      | <a href="https://www.bdbiosciences.com/en-us/instruments/research-instruments/research-software/flow-cytometry-acquisition/facsdiva-software">https://www.bdbiosciences.com/en-us/instruments/research-instruments/research-software/flow-cytometry-acquisition/facsdiva-software</a> |
| Prism 8                                                                                 | GraphPad Software, LLC.              | <a href="https://www.graphpad.com">https://www.graphpad.com</a>                                                                                                                                                                                                                       |
| R version 3.6                                                                           | The R Foundation                     | <a href="https://www.r-project.org">https://www.r-project.org</a>                                                                                                                                                                                                                     |

**ESM Table 2: Primers sequences used for quantitative real time-PCR.**

| Gene                        | Forward Primer               | Reverse Primer                |
|-----------------------------|------------------------------|-------------------------------|
| <b>Housekeeping genes</b>   |                              |                               |
| <i>B2m</i>                  | 5' TTCTGGTGCTTGCTCACTGA      | 5' CAGTATGTTCCGGCTCCCATTC     |
| <i>Ppia</i>                 | 5' GAGCTGTTTGAGACAAAAGTTC    | 5' CCCTGGCACATGAATCCTGG       |
| <b>Inflammation markers</b> |                              |                               |
| <i>Tnf</i>                  | 5' ACTGAACTTCGGGGTGATCG      | 5' TGAGGGTCTGGGCCATAGAA       |
| <i>Il1b</i>                 | 5' GCAACTGTTCCCTGAACTCAACT   | 5' ATCTTTTGGGGTCCGTCAACT      |
| <i>Il6</i>                  | 5' GGATACCACTCCCAACAGACCT    | 5' GCCATTGCACAACCTTTTCTC      |
| <i>Cxcl1</i>                | 5' CTGGGATTACCTCAAGAACATC    | 5' CAGGGTCAAGGCAAGCCTC        |
| <b>Immune cells</b>         |                              |                               |
| <i>Cd68</i>                 | 5' GCAGCACAGTGGACATTCAT      | 5' AGAGAAACATGGCCC GAAGT      |
| <i>Adgre1 (Emr1)</i>        | 5' GCC CAG GAGTGGAAATGCAA    | 5' CAGACACTCATCAACATCTGCG     |
| <i>CD45</i>                 | 5'ATGGTCCTCTGAATAAAGCCCA     | 5'TCAGCACTATTGGTAGGCTCC       |
| <b>Beta-cell identity</b>   |                              |                               |
| <i>Pdx1</i>                 | 5'CCC CAG TTT ACA AGC TCG CT | 5'CTC GGT TCC ATT CGG GAA AGG |
| <i>Foxo1</i>                | 5'GTA CGC CGA CCT CAT CAC CA | 5'TGC TGT CGC CCT TAT CCT TG  |
| <i>Ins2</i>                 | 5'CCC TGC TGG CCC TGC TCT T  | 5'AGG TCT GAA GGT CAC CTG CT  |

**ESM Table 3: Differential gene expression of islets upon CSF1R-inhibition by PLX5622 (separate excel file).** Full results table for the differential expression analysis comparing islets isolated from mice on PLX5622 or control diet (first tab).

**ESM Table 4: Gene set enrichment analysis based on the differential expression analysis, performed on the MSigDB collection c5 (separate excel file).** Full results from the gene set enrichment analysis based on the differential expression analysis, performed on the MSigDB collection c5 (second tab).

**ESM Table 5: Gene set enrichment analysis based on the differential expression analysis, performed on the MSigDB collection c8 (separate excel file).**

Full results from the gene set enrichment analysis based on the differential expression analysis, performed on the MSigDB collection c8 (third tab).

**ESM Table 6: Gene set enrichment analysis based on the differential expression analysis, performed on the hallmark pathways (separate excel file).** Full results from the gene set enrichment analysis based on the differential expression analysis, performed on the hallmark pathways (fourth tab).

**ESM Table 7: Down-regulated mediators of cytokine activity upon CSF1R-inhibition.**

| Symbol          | Description                                                                                           | GeneID             | logFC  | logCPM | FDR       |
|-----------------|-------------------------------------------------------------------------------------------------------|--------------------|--------|--------|-----------|
| <i>Lilrb4a</i>  | Leukocyte immunoglobulin-like receptor, subfamily B, member 4A                                        | ENSMUSG00000112148 | -4.411 | 1.761  | 0.0000005 |
| <i>Cd74</i>     | CD74 antigen (invariant polypeptide of major histocompatibility complex, class II antigen-associated) | ENSMUSG00000024610 | -4.910 | 5.579  | 0.0000005 |
| <i>Mmp12</i>    | Matrix metalloproteinase 12                                                                           | ENSMUSG00000049723 | -4.854 | 2.173  | 0.0000001 |
| <i>Nckap1l</i>  | NCK associated protein 1 like                                                                         | ENSMUSG00000022488 | -3.412 | 0.753  | 0.0000001 |
| <i>Cybb</i>     | Cytochrome b-245, beta polypeptide                                                                    | ENSMUSG00000015340 | -3.673 | 0.725  | 0.0000002 |
| <i>Laptm5</i>   | Lysosomal-associated protein transmembrane 5                                                          | ENSMUSG00000028581 | -3.198 | 1.243  | 0.0000002 |
| <i>Tyrobp</i>   | TYRO protein tyrosine kinase binding protein                                                          | ENSMUSG00000030579 | -3.143 | 0.072  | 0.0000004 |
| <i>Ptafr</i>    | Platelet-activating factor receptor                                                                   | ENSMUSG00000056529 | -2.271 | -0.670 | 0.0000002 |
| <i>C3ar1</i>    | Complement component 3a receptor 1                                                                    | ENSMUSG00000040552 | -2.832 | -0.292 | 0.0000003 |
| <i>Tnf</i>      | Tumor necrosis factor                                                                                 | ENSMUSG00000024401 | -2.095 | -1.191 | 0.0000004 |
| <i>Cd36</i>     | CD36 molecule                                                                                         | ENSMUSG00000002944 | -1.652 | 2.075  | 0.0000004 |
| <i>Slc11a1</i>  | Solute carrier family 11 (proton-coupled divalent metal ion transporters), member 1                   | ENSMUSG00000026177 | -2.315 | 0.219  | 0.0000005 |
| <i>Nlrp3</i>    | NLR family, pyrin domain containing 3                                                                 | ENSMUSG00000032691 | -2.305 | -0.653 | 0.0000001 |
| <i>Spi1</i>     | Spleen focus forming virus (SFFV) proviral integration oncogene                                       | ENSMUSG00000002111 | -2.221 | -0.889 | 0.0000001 |
| <i>Ifi204</i>   | Interferon activated gene 204                                                                         | ENSMUSG00000073489 | -1.971 | -0.138 | 0.0000002 |
| <i>Ptprc</i>    | Protein tyrosine phosphatase, receptor type, C                                                        | ENSMUSG00000026395 | -2.541 | -0.168 | 0.0000003 |
| <i>Cd83</i>     | CD83 antigen                                                                                          | ENSMUSG00000015396 | -1.325 | 1.355  | 0.0000004 |
| <i>Ifi207</i>   | Interferon activated gene 207                                                                         | ENSMUSG00000073490 | -1.904 | 0.440  | 0.0000004 |
| <i>Ccr5</i>     | Chemokine (C-C motif) receptor 5                                                                      | ENSMUSG00000079227 | -2.322 | -0.932 | 0.0000001 |
| <i>Ccl3</i>     | Chemokine (C-C motif) ligand 3                                                                        | ENSMUSG00000000982 | -2.003 | -1.437 | 0.0000001 |
| <i>Acp5</i>     | Acid phosphatase 5, tartrate resistant                                                                | ENSMUSG00000001348 | -2.603 | -0.524 | 0.0000001 |
| <i>Clec7a</i>   | C-type lectin domain family 7, member a                                                               | ENSMUSG00000079293 | -2.368 | -0.785 | 0.0000001 |
| <i>Rab7b</i>    | RAB7B, member RAS oncogene family                                                                     | ENSMUSG00000052688 | -1.335 | 0.041  | 0.0000001 |
| <i>Tnfrsf1b</i> | Tumor necrosis factor receptor superfamily, member 1b                                                 | ENSMUSG00000028599 | -1.192 | 1.974  | 0.0000001 |
| <i>Havcr2</i>   | Hepatitis A virus cellular receptor 2                                                                 | ENSMUSG00000020399 | -2.028 | -0.137 | 0.0000001 |
| <i>Axl</i>      | AXL receptor tyrosine kinase                                                                          | ENSMUSG00000002602 | -0.919 | 2.929  | 0.0000001 |
| <i>Vsir</i>     | V-set immunoregulatory receptor                                                                       | ENSMUSG00000020101 | -1.032 | 0.310  | 0.0000002 |
| <i>Hmox1</i>    | Heme oxygenase 1                                                                                      | ENSMUSG00000005413 | -0.868 | 5.188  | 0.0000003 |
| <i>Fcgr3</i>    | Fc receptor, igg, low affinity III                                                                    | ENSMUSG00000059498 | -1.965 | -1.002 | 0.0000004 |
| <i>Cebpa</i>    | CCAAT/enhancer binding protein (C/EBP), alpha                                                         | ENSMUSG00000034957 | -0.988 | 0.635  | 0.0000005 |
| <i>Irf5</i>     | Interferon regulatory factor 5                                                                        | ENSMUSG00000029771 | -1.474 | -0.277 | 0.001     |

|                |                                                         |                    |        |        |       |
|----------------|---------------------------------------------------------|--------------------|--------|--------|-------|
| <i>Syk</i>     | Spleen tyrosine kinase                                  | ENSMUSG00000021457 | -1.661 | 0.541  | 0.001 |
| <i>Bst2</i>    | Bone marrow stromal cell antigen 2                      | ENSMUSG00000046718 | -0.876 | 2.108  | 0.002 |
| <i>Stat6</i>   | Signal transducer and activator of transcription 6      | ENSMUSG00000002147 | -0.337 | 5.483  | 0.003 |
| <i>Pld4</i>    | Phospholipase D family, member 4                        | ENSMUSG00000052160 | -1.210 | -0.095 | 0.003 |
| <i>Cd14</i>    | CD14 antigen                                            | ENSMUSG00000051439 | -1.234 | 2.233  | 0.003 |
| <i>Sp100</i>   | Nuclear antigen Sp100                                   | ENSMUSG00000026222 | -1.123 | 0.562  | 0.004 |
| <i>Tlr2</i>    | Toll-like receptor 2                                    | ENSMUSG00000027995 | -0.387 | 5.503  | 0.005 |
| <i>Cyba</i>    | Cytochrome b-245, alpha polypeptide                     | ENSMUSG00000006519 | -0.958 | 0.640  | 0.007 |
| <i>Ccl5</i>    | Chemokine (C-C motif) ligand 5                          | ENSMUSG00000035042 | -1.891 | -0.134 | 0.007 |
| <i>P2rx7</i>   | Purinergic receptor P2X, ligand-gated ion channel, 7    | ENSMUSG00000029468 | -1.002 | 0.010  | 0.009 |
| <i>Fcgr1g</i>  | Fc receptor, ige, high affinity I, gamma polypeptide    | ENSMUSG00000058715 | -0.667 | 1.924  | 0.011 |
| <i>Npas4</i>   | Neuronal PAS domain protein 4                           | ENSMUSG00000045903 | 0.722  | 7.356  | 0.012 |
| <i>Zeb2</i>    | Zinc finger E-box binding homeobox 2                    | ENSMUSG00000026872 | -0.600 | 1.836  | 0.012 |
| <i>Il1r2</i>   | Interleukin 1 receptor, type II                         | ENSMUSG00000026073 | -0.727 | 1.623  | 0.017 |
| <i>Oas1a</i>   | 2'-5' oligoadenylate synthetase 1A                      | ENSMUSG00000052776 | -0.821 | 1.078  | 0.020 |
| <i>Zbtb48</i>  | Zinc finger and BTB domain containing 48                | ENSMUSG00000028952 | 0.313  | 3.950  | 0.021 |
| <i>Irf7</i>    | Interferon regulatory factor 7                          | ENSMUSG00000025498 | -0.985 | 2.854  | 0.021 |
| <i>Gbp5</i>    | Guanylate binding protein 5                             | ENSMUSG00000105504 | -1.286 | 0.583  | 0.023 |
| <i>Hsf2</i>    | Heat shock factor 2                                     | ENSMUSG00000019878 | 0.251  | 4.850  | 0.023 |
| <i>Cd40</i>    | CD40 antigen                                            | ENSMUSG00000017652 | -0.921 | 0.781  | 0.027 |
| <i>Kit</i>     | KIT proto-oncogene receptor tyrosine kinase             | ENSMUSG00000005672 | -0.463 | 2.253  | 0.029 |
| <i>Trim30a</i> | Tripartite motif-containing 30A                         | ENSMUSG00000030921 | -1.067 | -0.048 | 0.029 |
| <i>Zfp9</i>    | Zinc finger protein 9                                   | ENSMUSG00000072623 | 0.300  | 6.222  | 0.031 |
| <i>Akap8</i>   | A kinase (PRKA) anchor protein 8                        | ENSMUSG00000024045 | 0.279  | 6.246  | 0.041 |
| <i>Frmf8</i>   | FERM domain containing 8                                | ENSMUSG00000024816 | -0.354 | 3.274  | 0.048 |
| <i>Gprc5b</i>  | G protein-coupled receptor, family C, group 5, member B | ENSMUSG00000008734 | -0.336 | 3.524  | 0.048 |

## ESM Figures

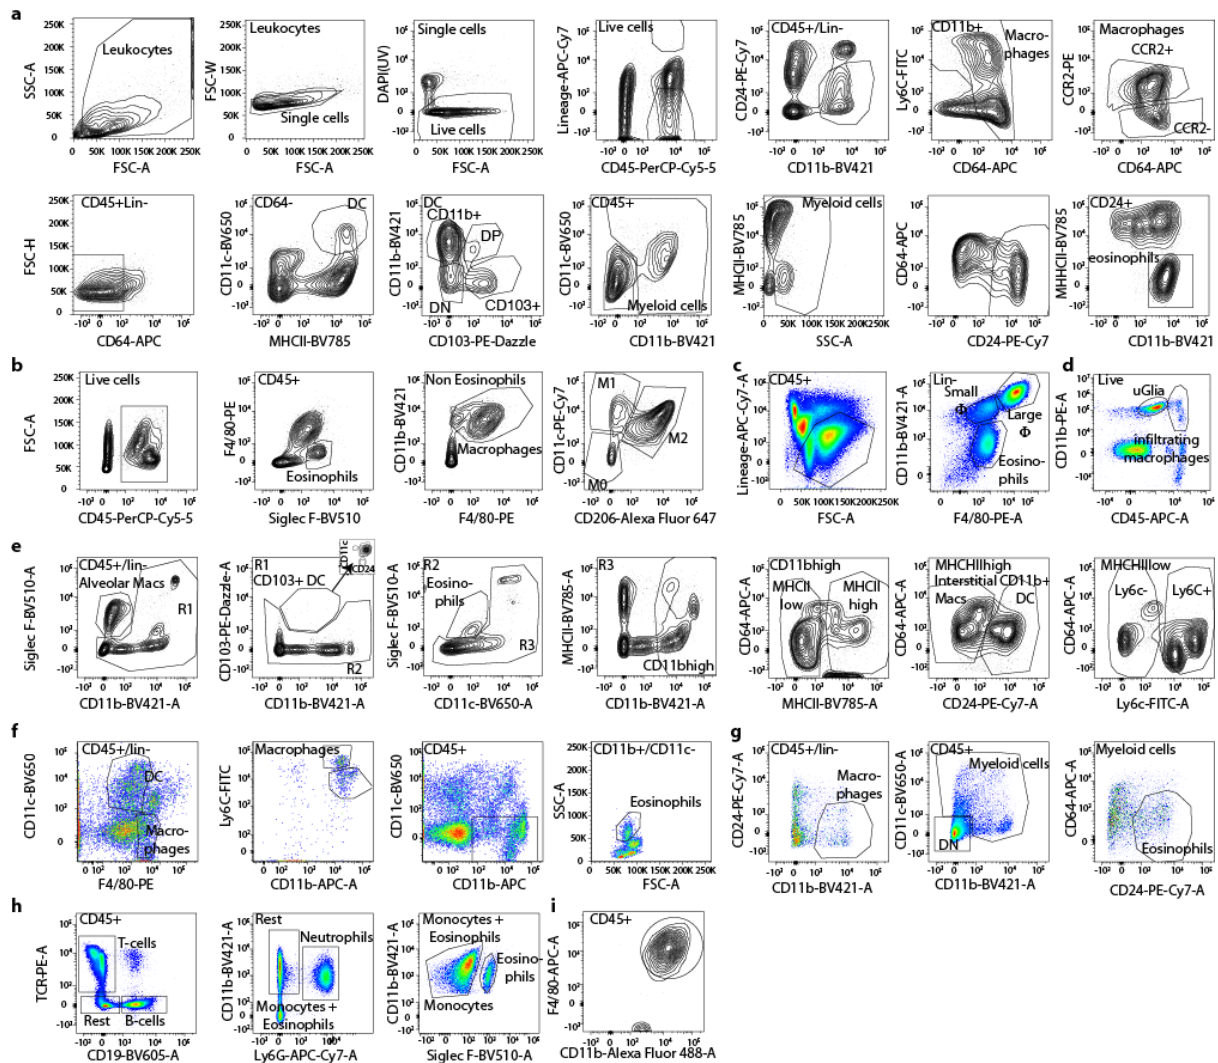

**ESM Fig. 1: Gating strategies of macrophages, dendritic cells and eosinophils in different organs.** Gating strategy in (a) colon (b) adipose tissue, (c) peritoneum, (d) brain (e) lung, (f) liver, (g) spleen, (h) blood and (i) islets. All gating strategies included a leukocyte gate, followed by doublet exclusion and exclusion of dead cells (only shown in panel a). Further gating included CD45 and lineage (CD19, Nk1.1, CD3 and Ly6G).

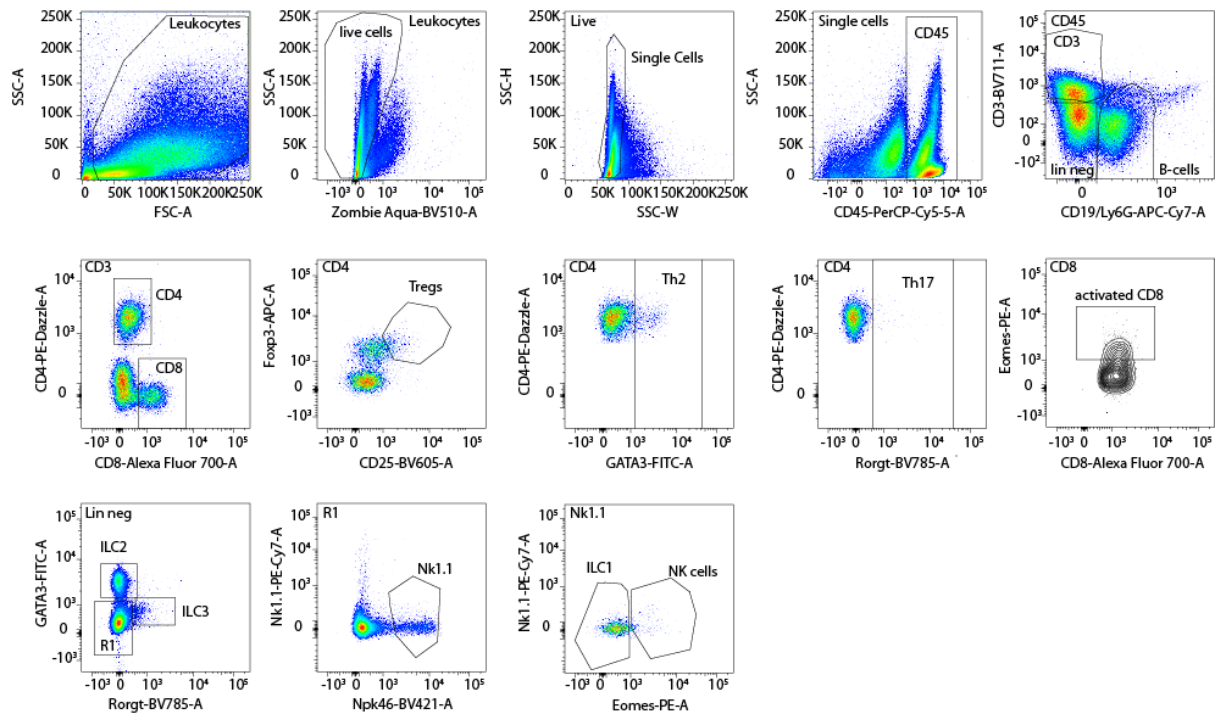

**ESM Fig. 2: Gating strategy for Innate lymphoid cells and adaptive immunity.** Leukocytes were gated for live cells, and doublets excluded by FSC W and H. CD45<sup>+</sup> cells were analyzed for T and B-cells and ILCs. T-cells were defined as CD3<sup>+</sup> and either CD8<sup>+</sup> and CD4<sup>+</sup>, the latter ones were further analyzed for Tregs defined as Foxp3<sup>+</sup> and CD25<sup>+</sup>, Th2 identified by the expression of GATA3 and TH17 identified by ROR $\gamma$ t. ILCs were defined as CD3<sup>-</sup>/lineage<sup>-</sup> cells, different subpopulations were further defined as ROR $\gamma$ t<sup>+</sup> (ILC3), and GATA3<sup>+</sup> (ILC2).

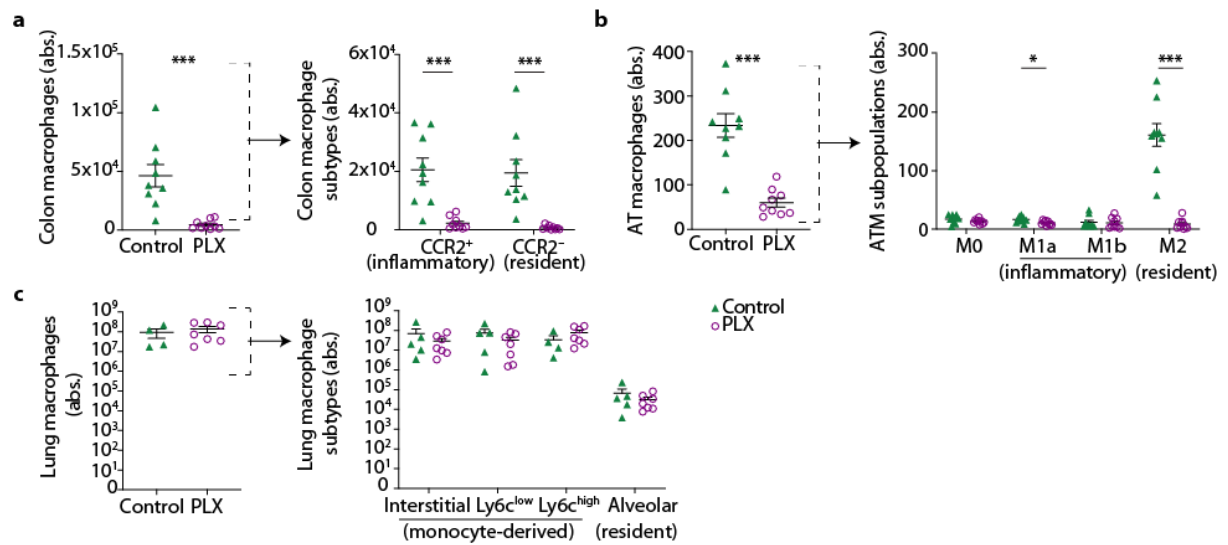

**ESM Fig. 3: Absolute numbers of tissue resident macrophages upon PLX5622 treatment.**

Set-up see Fig. 1. **a-c**, Total macrophages (left panel) and subpopulations (right panel) of (a) colon, (b) adipose tissue and (c) lung. Data are shown as mean±SEM. Data are representative of 3 (a, b) independent experiments or one experiment (c) with each data point representing an individual mouse. \*p<0.05, \*\*p<0.01, \*\*\*p<0.001, unpaired Mann-Whitney U test with two-tailed distribution.

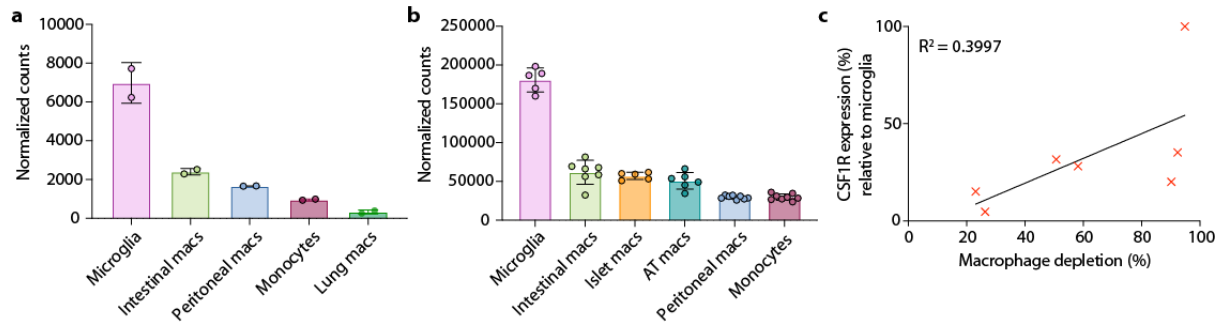

**ESM Fig. 4: CSF1R expression in macrophages across different organs.** (a) Dataset obtained from Lavin, 2014. (b) Data obtained from Brykcznska, 2020. (c) Correlation between macrophage depletion (%) and CSF1R expression in relation to CSF1R expression in microglia.



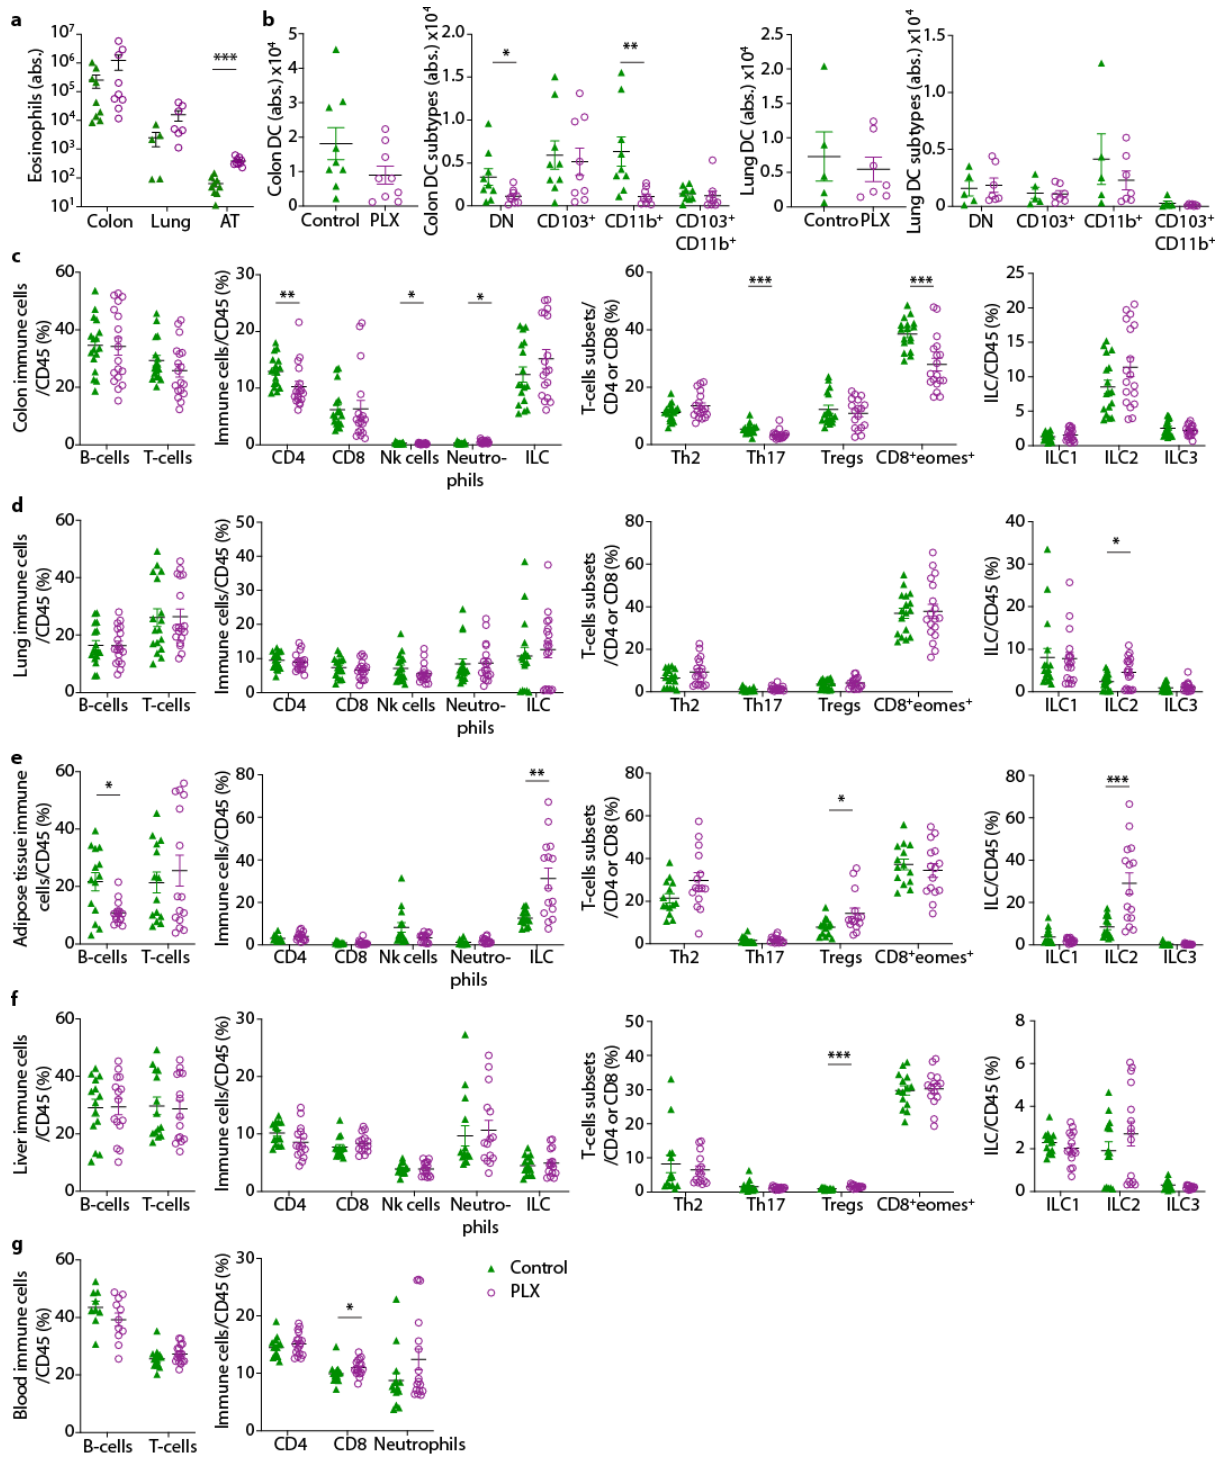

**ESM Fig. 5: Changes in immune cells upon CSF1R-inhibition by PLX5622.** Mice were fed a PLX5622-containing (purple circles) or control diet (green triangles) starting from 4-5 weeks of age for up to 5.5 months (**a, b**) or starting from 8-9 weeks of age for 3 weeks (**c-g**). **a**, Absolute numbers of eosinophils. **b**, Absolute numbers of dendritic cells (DCs) and their subpopulations in the colon and lung. **c-f**, Frequencies of B and T-cells, CD4, CD8 T-cells and

their subsets, NK cells, neutrophils and ILC in colon (**c**), lung (**d**), adipose tissue (**e**) and liver (**f**). **g**, Frequencies of B and T cells and neutrophils in blood. Data are shown as mean±SEM. Pooled data of three independent experiments (**c-g**) or representative of three or one experiment (**a, b**) with each data point representing an individual mouse. \* $p < 0.05$ , \*\* $p < 0.01$ , \*\*\* $p < 0.001$ , unpaired Mann-Whitney U test with two-tailed distribution.

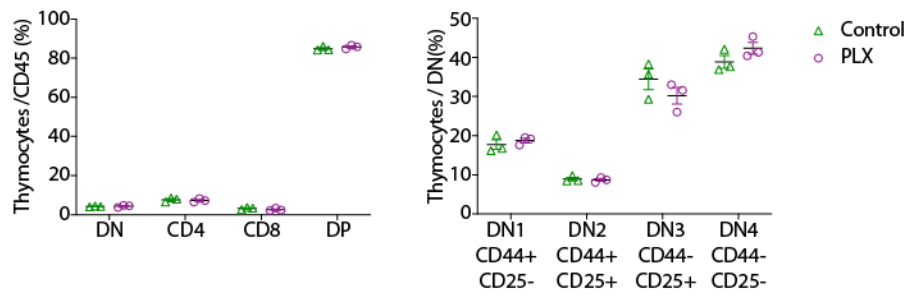

**ESM Fig. 6: Depletion of macrophages does not affect T cell development.** Mice were fed a PLX5622-containing (purple circles) or control diet (green triangles) for 3 weeks. Total thymocytes (left panel) and double negative thymocytes (right panel). Data are shown as mean $\pm$ SEM. One experiment with 3 mice each, each data point representing an individual mouse.

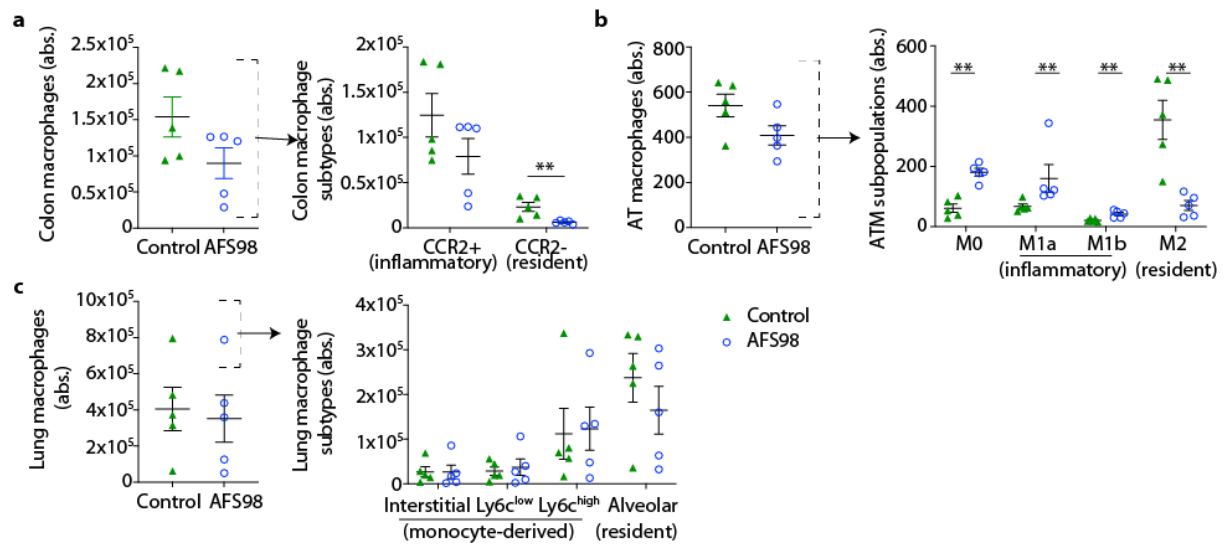

**ESM Fig. 7: Absolute numbers of tissue resident macrophages upon CSF1R antibody treatment.** Mice were treated for three weeks with the CSF1R antibody AFS98 (blue circles) or a rat IgG2a isotype control (green triangles) and immune cells of different organs were assessed by flow **a-c**, Total macrophages (left panel) and subpopulations (right panel) of **(a)** colon, **(b)** adipose tissue and **(c)** lung. Data are shown as mean±SEM. One experiments, with 5 mice each, each data point representing an individual mouse. \*\* $p < 0.01$ , unpaired Mann-Whitney U test with two-tailed distribution.

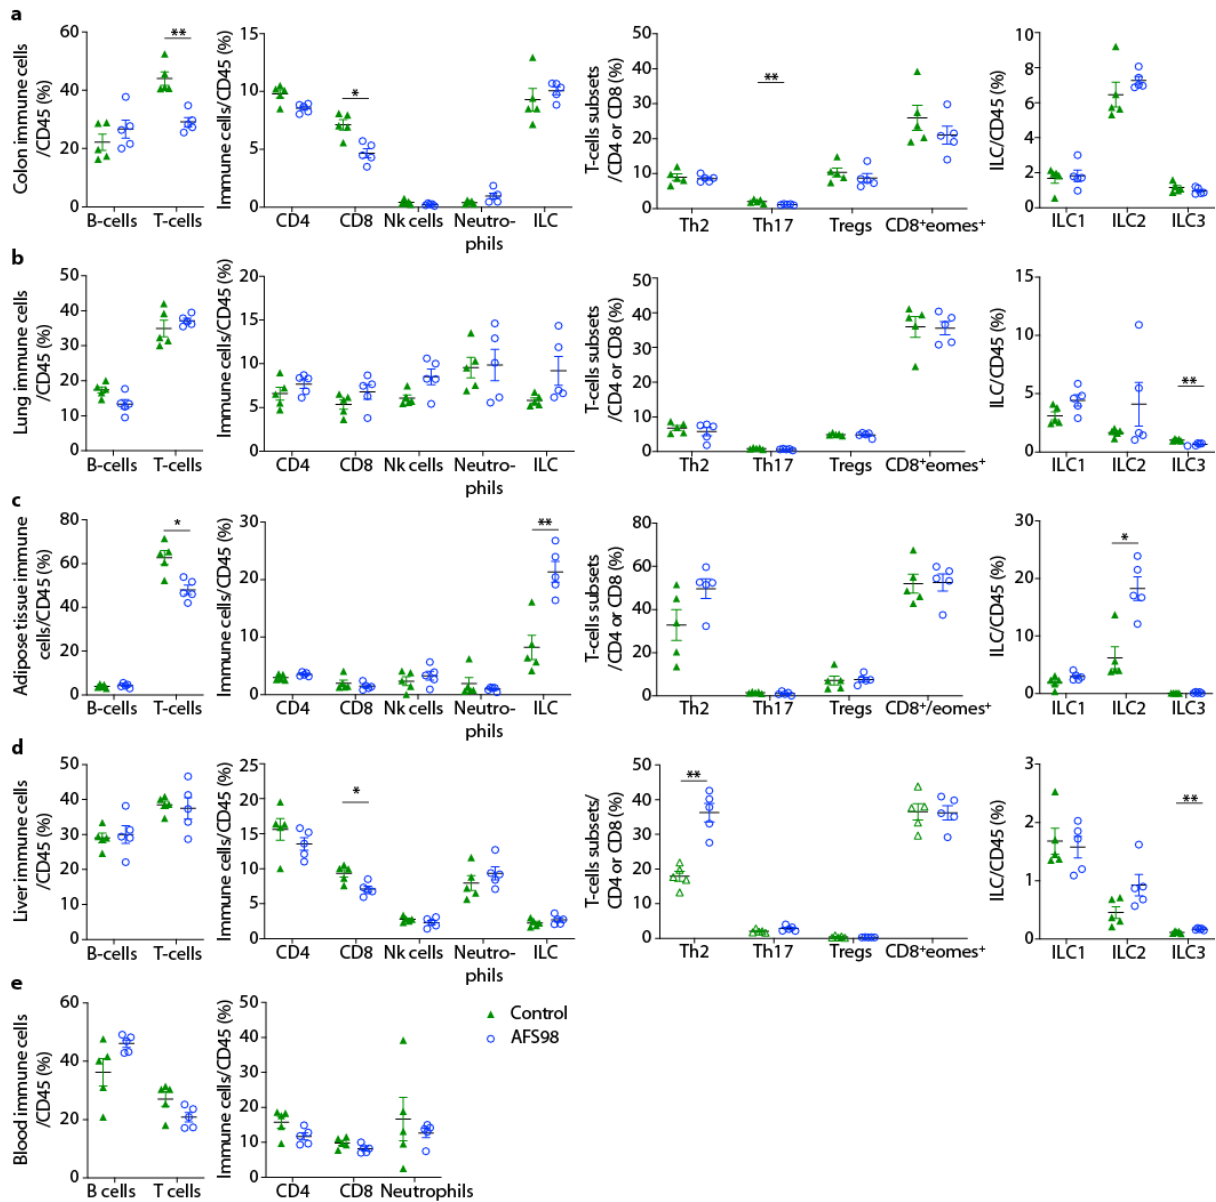

**ESM Fig. 8: Changes in immune cells upon CSF1R antibody treatment.** Mice were treated for three weeks with the CSF1R antibody AFS98 (blue circles) or a rat IgG2a isotype control (green triangles). **a-d**, Frequencies of B and T-cells, CD4, CD8 T-cells and their subsets, NK cells, neutrophils and ILCs in colon (**a**), lung (**b**), adipose tissue (**c**) and liver (**d**). **e**, Frequencies of B and T cells and neutrophils in blood. Data are shown as mean±SEM. One experiments, with 5 mice each, each data point representing an individual mouse. \* $p < 0.05$ , \*\* $p < 0.01$ , unpaired Mann-Whitney U test with two-tailed distribution.

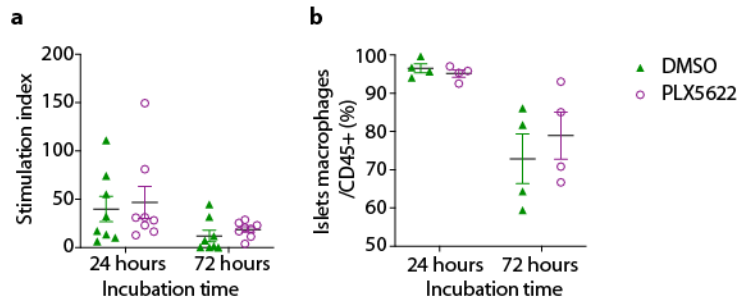

**ESM Fig. 9: PLX5622 is not toxic to pancreatic islets isolated from wild-type mice.** *Ex-vivo* treatment of islets with PLX5622 (purple circles) or DMSO (green triangles) for 24 and 72 hours, respectively. **a,b**, Effect of 24 or 72 hours of PLX5622 treatment on (a) stimulation index during *ex vivo* glucose stimulated insulin secretion (GSIS) and (b) islet macrophages. Data are shown as mean $\pm$ SEM. Pooled data from two independent experiments, unpaired Mann-Whitney U test with two-tailed distribution.

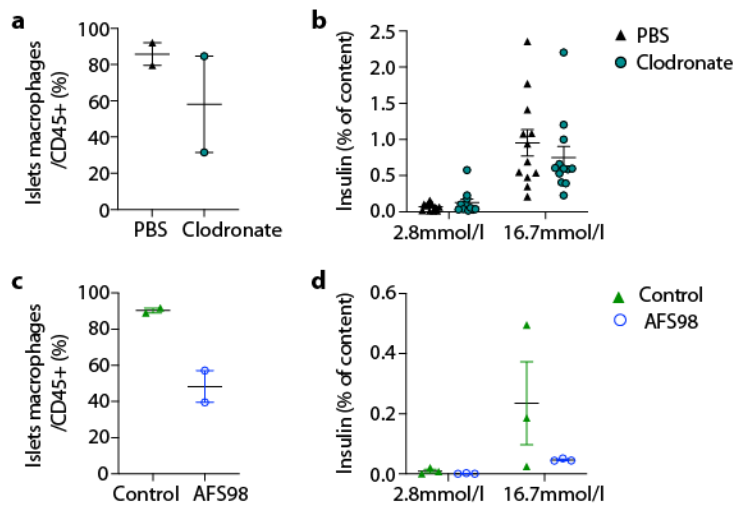

**ESM Fig. 10: Macrophage depletion reduces insulin secretion in wild type islets.** Islet macrophages were depleted either *ex-vivo* by clodronate treatment for 24 hours or by AFS98 antibody (i.p. 1mg/mouse) once weekly over 3 weeks. **a,b** Macrophages were depleted by clodronate (turquoise circles) or PBS liposomes (control; black triangles) treatment over 24 hours. **(a)** Frequency of islet macrophages after 24 hours of culture with clodronate or PBS liposomes. **(b)** *Ex-vivo* insulin release in a glucose stimulated insulin secretion assay (GSIS) after *ex-vivo* treatment of islets with clodronate or PBS liposome. **c, d** Mice were treated over 3 weeks once weekly with the CSF1R anti-body AFS98 (blue circles) or its corresponding control anti-body (green triangles) at a dose of 1mg/mouse (i.p.). **(c)** Frequency of islet macrophages after treatment. **(d)** Insulin release *ex-vivo* in a glucose stimulated insulin secretion assay (GSIS) over one hour of islets from treated mice. Data are shown as mean $\pm$ SEM, Pooled data from two independent experiments (b), three independent experiment (c) or one experiment (c, d), with each point representing one mouse (d) or technical replicates (b) unpaired Mann-Whitney U test with two-tailed distribution.





**ESM Fig. 11: Heatmap showing the centered and scaled normalized expression levels of genes differentially expressed in islets of Langerhans upon CSF1R-inhibition. FDR<5%**

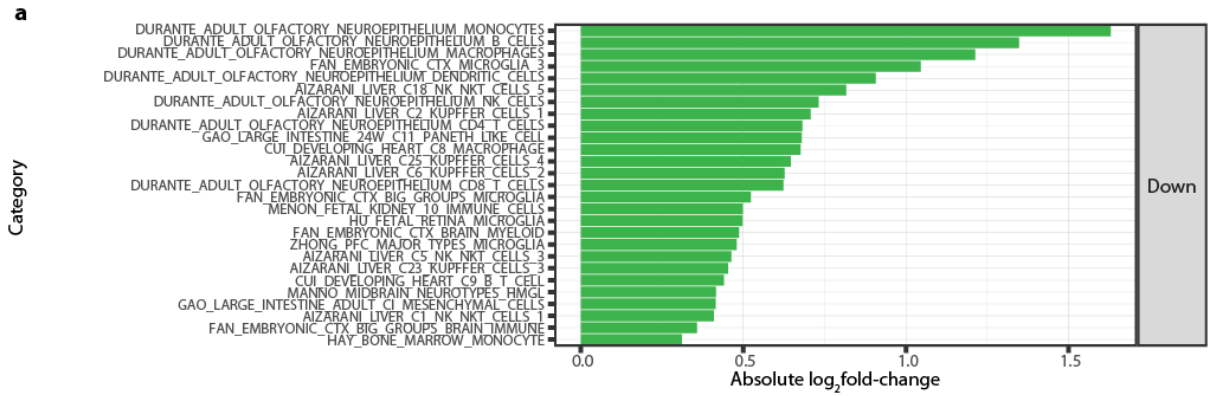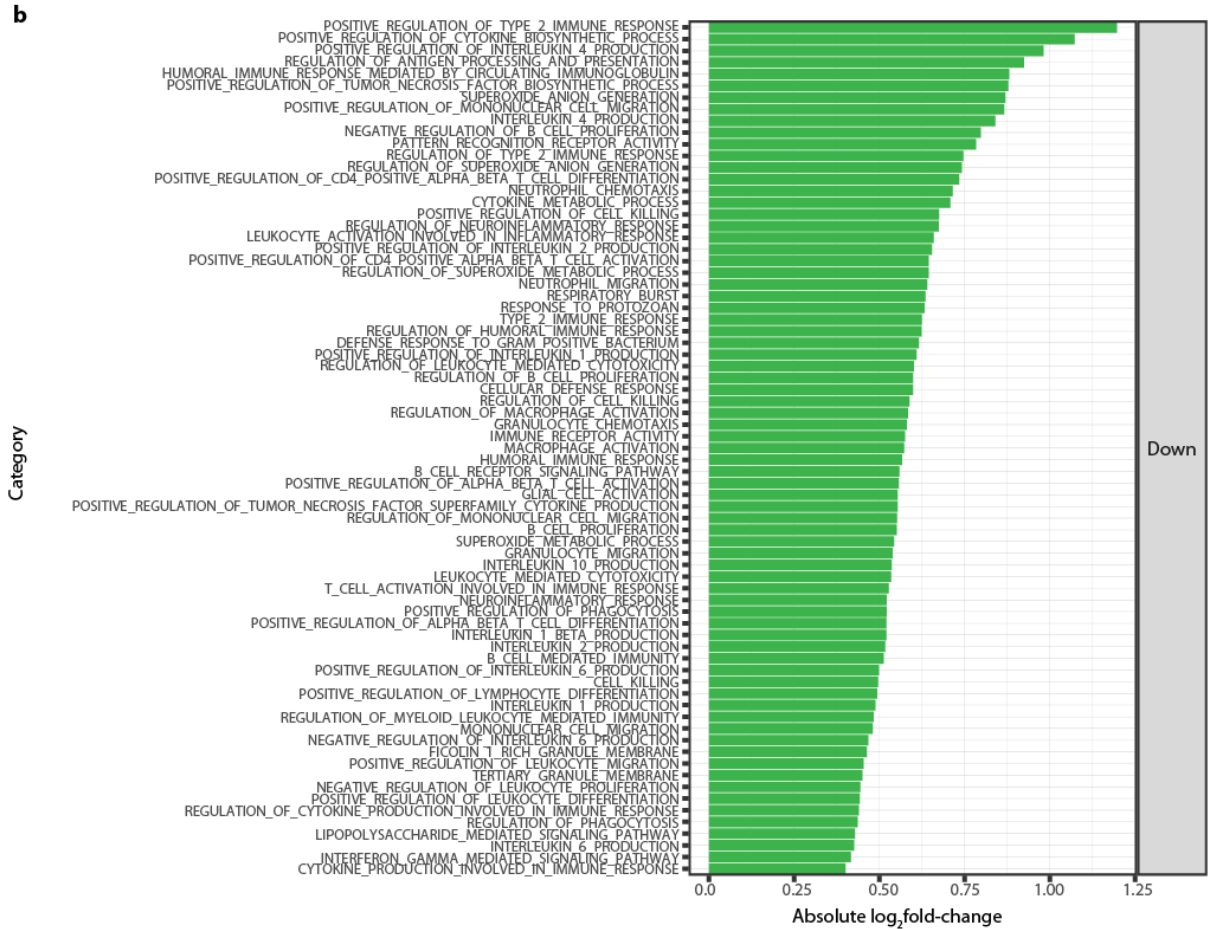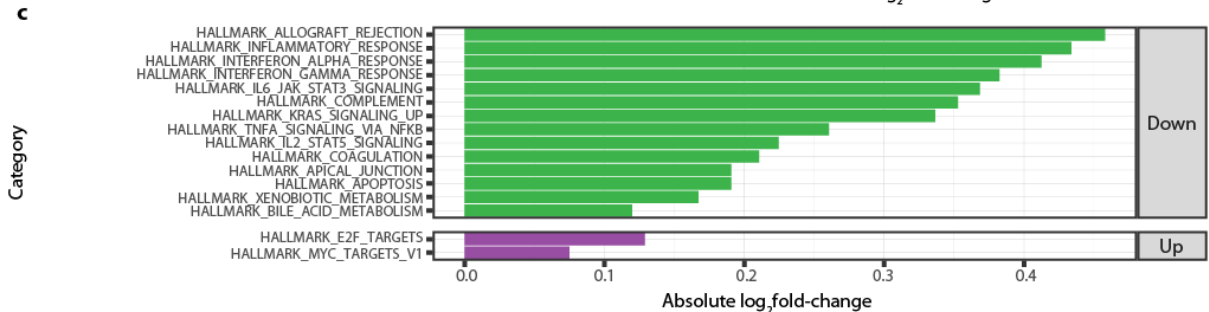

Direction

Up

Down

**ESM Fig 12: Top differentially regulated MSigDB signatures upon CSF1R-inhibition.**

**(a)** Top differentially regulated MSigDB C8 cell type signatures upon CSF1R-inhibition. p-value  $< 10^{-10}$ . **(b)** Top differentially regulated MSigDB C5 gene ontology terms upon CSF1R-inhibition. p-value  $< 10^{-10}$  and gene set size  $< 100$  genes. **(c)** Top differentially regulated MSigDB hallmark gene sets upon CSF1R-inhibition. FDR $<5\%$ . Full analysis results in ESM Table 3.
